# Supplementary material
Source: HighWire-hosted journal article supplement (https://thorax.bmj.com/content/thoraxjnl-2017-211376)
Supplement: inline-supplementary-material-1 [file inline-supplementary-material-1.pdf]

**Characteristics of new solid nodules detected in incidence screening rounds of  
low-dose CT lung cancer screening: The NELSON study**

**ONLINE SUPPLEMENT**

**Supplemental Figure 1: Bootstrap calibration plots of actual probability vs. model  
predicted probability for lung cancer, with ideal, apparent, and bias-corrected curves**

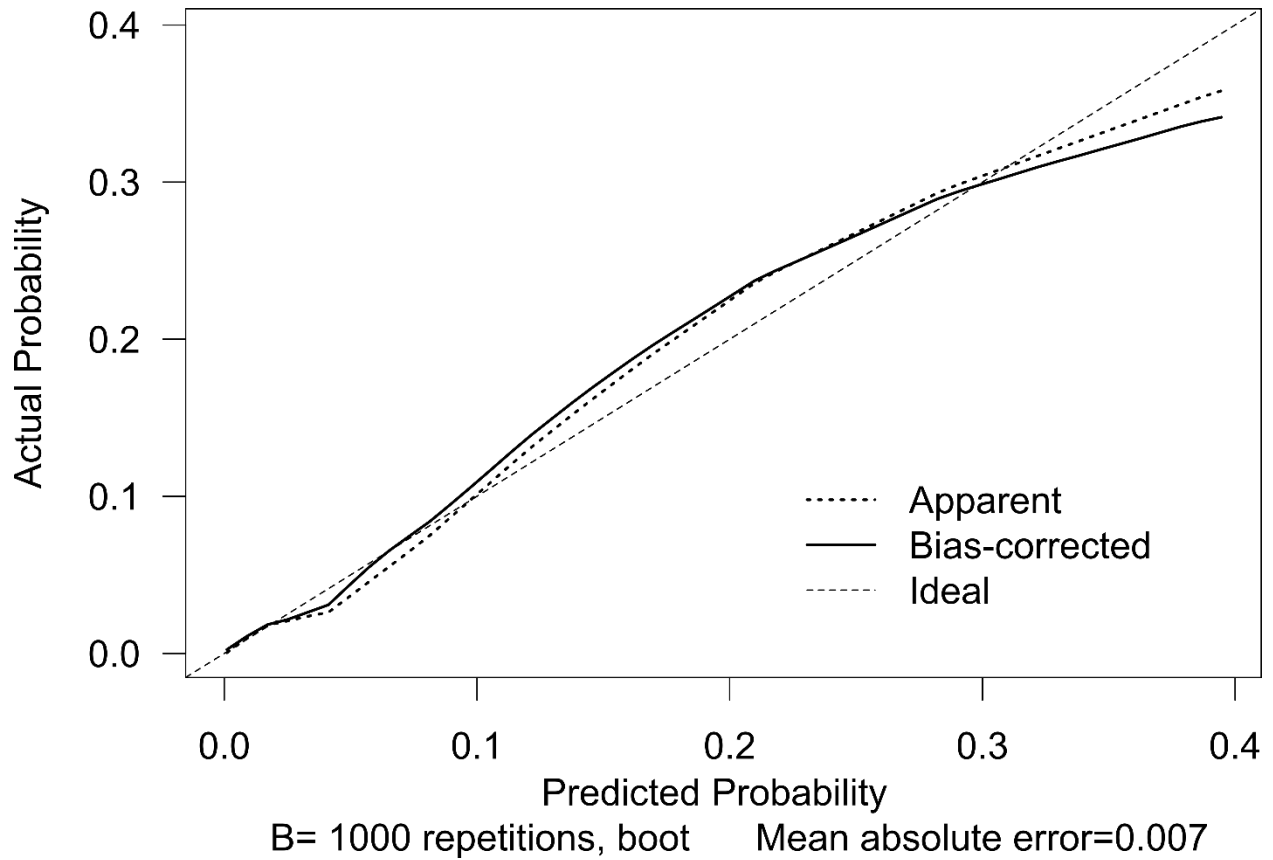

**Supplemental Figure 1: Bootstrap calibration plots of actual probability vs. model predicted probability for lung cancer, with ideal, apparent, and bias-corrected curves**
